# Supplementary material for: Safety and Immunogenicity of Intradermal Administration of Fractional Dose CoronaVac®, ChAdOx1 nCoV-19 and BNT162b2 as Primary Series Vaccination
Source: bioRxiv or medRxiv preprint supplement (doi:10.1101/2022.08.09.22278505), 2022-08-10

Supplementary Figure 1

## Systemic reaction

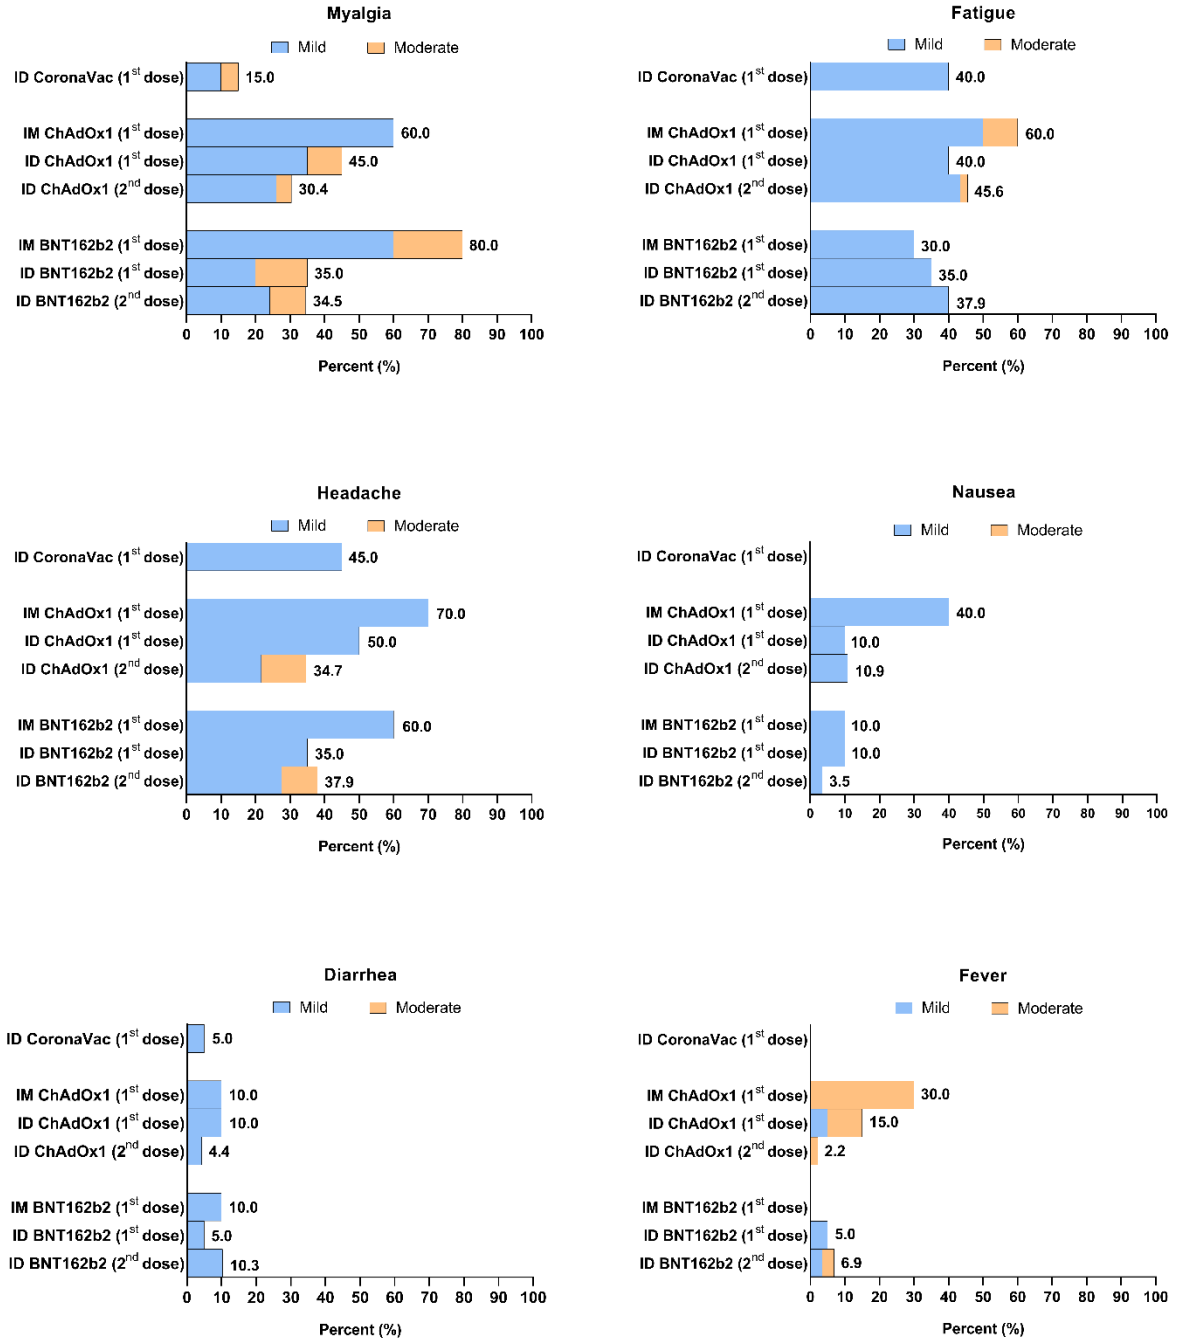

Supplement: Supplementary file [file media-1.pdf]
